# Supplementary material
Source: publisher site journal article supplement (https://www.dovepress.com/article/304547)
Supplement: Supplementary file 1 [file get_supplementary_file.php]

**Supplementary material**

**Supplementary material 1:** Profiles of derived features

| **Category** | **Images for extraction** | **Number (features)** | **Description** |
| --- | --- | --- | --- |
| DCEshape | 1st postcontrast phase | 14 | The 14 shape-based features were calculated on the first postcontrast DCE images. |
| DCEtexture | Precontrast phase | 93 | The 93 texture features (including 18 first order features, 24 gray level co-occurrence matrix (GLCM) features, 16 gray level run length matrix (GLRLM) features, 16 gray level size zone matrix (GLSZM) features, 5 neighboring gray tone difference matrix (NGTDM) features, and 14 gray level dependence matrix (GLDM) features were calculated on these four series image sets to yield 372 features. |
| 1st postcontrast phase | 93 |
| 2nd postcontrast phase | 93 |
| 3rd postcontrast phase | 93 |
| DCEsequential | Mean | 93 | To characterize the textural changes on DCE images over time serials, we measured ten new sequential features for each texture feature described in group b (supplementary Table S2). The first six features, including mean, variance, kurtosis, skewness, energy, and entropy, were extracted from each individual subject. The other four features, including Kendall-tau-b, conservation, stability, and dispersion, were calculated from the interactive information between the current subject and the remainder of the subjects. Therefore, a total of 930 DCEsequential features were extracted from 83 texture features. |
| Variance | 93 |
| Kurtosis | 93 |
| Skewness | 93 |
| Energy | 93 |
| Entropy | 93 |
| Kendall-tau-b | 93 |
| Conservation | 93 |
| Stability | 93 |
| Dispersion | 93 |

**Supplementary material 2:** Formulas for the ten new sequential features

| p denotes patient; t denotes the phase for the DCE image |
| --- |
|  |
|  |
|  |
|  |
|  |
| - is the first order histogram with  discrete intensity levels, where  is the number of non-zero bins - is the normalized first order histogram and is equal to . - Here, ϵ is an arbitrarily small positive number (≈2.2×). |
| **Kendall's tau-b**  Kendall's tau-b is a nonparametric measure of association based on the number of concordances and discordances in the paired observations. In this work, Kendall's tau-b was used to measure the coordinated consistency of changing features between one patient and the remaining patients.  The consistent coefficient between two patients (p and p’) at two time points (t and t’) was calculated as follows (Equation (1)):  (p=1, 2,…,, p’=p+1,p+2,…, , t=1,2,…, , t’=t+1,t+2,…,,)  where x is the value of one of the texture features, is the number of patients, and is the number of time points. Therefore, *(-1)/2 consistent coefficients in total were obtained for each pair of patients.  The consistent coefficients are subsequently subclassified into four groups, . The corresponding number of items is: and .  Kendall's tau-b was calculated as follows: |
| **Conservation**  The conservation of patients was calculated as follows:  Here, the absolute value of the Pearson correlation coefficient was used because both positive and negative values indicate that the two patients are relatively conserved. |
| **Stability**  Stability was defined by Equation (4):  where (or ) indicated the percentage of patients whose coefficient of variation (CV) did not exceed the CV of patient (or ). |
| **Dispersion**  Let ,,, .  We assumed that was larger than , and the dispersion was defined as follows:  (6) |

**Supplementary material 3:** The Rad-score Formula of Logistic Regression based on CE1

Rad-score1 = 0.4252＋0.14261*X1－0.086037*X2－0.28119*X3＋0.092546*X4＋0.86661*X5－0.88947*X6

**Supplementary material 4:** The Rad-score Formula of liner SVM based on CEm

Rad-score2 = 0.4252＋0.10267*Y1－0.16695*Y2－0.12109*Y3－0.14636*Y4－0.10759*Y5＋0.16895*Y6

**Supplementary material 5:** The important featues derived from the CE1

| Number | Image Group | Feature Type | Feature | Definition of the Feature |
| --- | --- | --- | --- | --- |
| X1 | DCEtexture | First Order | Range | The range of gray values in the ROI |
| X2 | DCEtexture | First Order | Skewness | the asymmetry of the distribution of values about the Mean value |
| X3 | DCEtexture | GLCM | Joint Entropy | a measure of the randomness/variability in neighborhood intensity values |
| X4 | DCEtexture | GLSZM | Size Zone Variance | measures the variance in zone size volumes for the zones |
| X5 | DCEtexture | GLSZM | Large Area Emphasis | a measure of the distribution of large area size zones, with a greater value indicative of more larger size zones and more coarse textures |
| X6 | DCEtexture | GLRLM | Run Length Non-Uniformity | measures the similarity of run lengths throughout the image, with a lower value indicating more homogeneity among run lengths in the image |

**Supplementary material 6:** The important featues derived from CEm

| Number | Image Group | Feature Type | Feature | Definition of the Feature |
| --- | --- | --- | --- | --- |
| Y1 | DCEsequential | Kurtosis_ firstorder | Entropy | specifies the uncertainty/randomness in the image values. It measures the average amount of information required to encode the image values |
| Y2 | DCEsequential | Entropy_ firstorder | 90percentile | refers to the 90th percentile voxel value in ROI |
| Y3 | DCEsequential | Kurtosis_ GLDM | Small Dependence Low Gray Level Emphasis | Measures the joint distribution of small dependence with lower gray-level values |
| Y4 | DCEsequential | Entropy_ GLCM | Cluster Prominence | a measure of the skewness and asymmetry of the GLCM |
| Y5 | DCEsequential | Dispersion_GLCM | Inverse Difference Moment | a measure of the local homogeneity of an image |
| Y6 | DCEsequential | Stability_GLRLM | Gray Level Non-Uniformity Normalized | measures the similarity of gray-level intensity values in the image, where a lower GLNN value correlates with a greater similarity in intensity values |
